# Supplementary material
Source: MDPI journal article supplement (https://www.mdpi.com/2073-445X/11/5/617)
Supplement: s1 [file s1]

# Modeling Cadmium Contents in a Soil–Rice System and Identifying Potential Controls

Yingfan Zhang <sup>1,2</sup>, Tingting Fu <sup>2</sup>, Xueyao Chen <sup>2</sup>, Hancheng Guo <sup>2</sup>, Hongyi Li <sup>3</sup>  
and Bifeng Hu <sup>3,4,5,\*</sup>

<sup>1</sup> Department of Computer Science, Swansea University, Fabian Way, Swansea SA1 8EN, UK; y.zhang.2105558@swansea.ac.uk

<sup>2</sup> Key Laboratory of Environment Remediation and Ecological Health, Ministry of Education, College of Environmental and Resource Sciences, Zhejiang University, Hangzhou 310058, China; ftt321@zju.edu.cn (T.F.); xueyao0217@zju.edu.cn (X.C.); ghczju@zju.edu.cn (H.G.)

<sup>3</sup> Department of Land Resource Management, School of Tourism and Urban Management, Jiangxi University of Finance and Economics, Nanchang 330013, China; lihongyi1981@zju.edu.cn

<sup>4</sup> Institute of Agricultural Remote Sensing and Information Technology Application, College of Environmental and Resource Sciences, Zhejiang University, Hangzhou 310058, China

<sup>5</sup> Key Laboratory of Agricultural Remote Sensing and Information Systems, College of Environmental and Resource Sciences, Zhejiang University, Hangzhou 310058, China

\* Correspondence: 21414118@zju.edu.cn Tel./Fax: +86-198-9230-9102

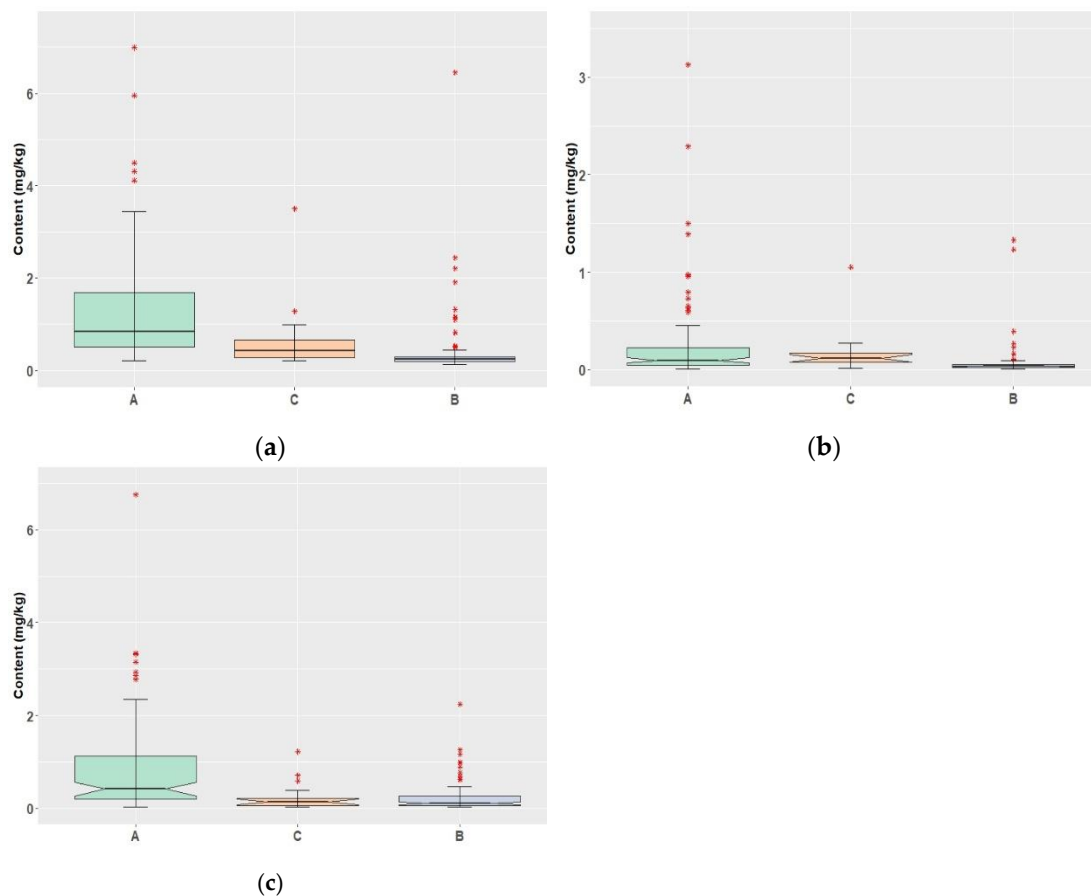

**Figure S1.** (a) Boxplot of total Cd content in soil. (b) Boxplot of available Cd content in soil. (c) Boxplot of Cd content in rice.

The first-order calculation formula was as follows:

$$\rho_{X,Y(Z)} = \frac{\rho_{X,Y} - \rho_{X,Z}\rho_{Y,Z}}{\sqrt{1-\rho_{X,Z}^2}\sqrt{1-\rho_{Y,Z}^2}}$$

where  $\rho_{X,Y(Z)}$  is the partial correlation coefficient between X and Y calculated after controlling variable Z, and  $\rho_{X,Y}$ ,  $\rho_{X,Z}$ , and  $\rho_{Y,Z}$  are the correlation coefficients between X and Y, X and Z, and Y and Z, respectively.
